# 1 **Tempo and timing of ecological trait divergence associated with transitions to** 2 **coexistence in birds**

3 Jay P. McEntee<sup>1,2</sup>, Joseph A. Tobias<sup>3</sup>, & J. Gordon Burleigh<sup>1</sup>

## 4 5 **Affiliations:**

6 <sup>1</sup>Biology Department, University of Florida, PO Box 118525, 220 Bartram Hall, Gainesville, FL 32611-  
7 8525, USA

8 <sup>2</sup>Ecology and Evolutionary Biology Department, University of Arizona, PO Box 210088, Biological  
9 Sciences West Room 310, 1041 E. Lowell St., Tucson, Arizona 85721, USA

10 <sup>3</sup>Department of Life Sciences, Imperial College London, Silwood Park, Ascot, Berkshire, SL5 7PY, UK

11 Number of words in the summary paragraph (252), in the manuscript as a whole, excluding summary  
12 paragraph, references, methods, and captions (1,780)

13 Number of words in Methods Summary (360) and in Methods for online version of the article (2,162)

14 Number of references in main text (50)

15 Number of figures (3) and tables (0)

16 Name and complete mailing address of the person to whom correspondence should be sent:

17 Jay McEntee, Biology Department, University of Florida, PO Box 118525, 220 Bartram Hall,  
18 Gainesville, FL 32611-8525, USA Email: [jaymcentee@ufl.edu](mailto:jaymcentee@ufl.edu)

## 19 20 **Summary paragraph**

21 Speciation in vertebrates is often viewed as a three-stage process beginning with an allopatric phase  
22 (geographic isolation), followed by secondary contact, and finally the transition to coexistence in  
23 overlapping geographical ranges (sympatry)<sup>1-4</sup>. In some forms of this model, the delay in establishing  
24 secondary sympatry is due to the slow divergence in ecological traits<sup>5</sup>, where such divergence reduces  
25 competition<sup>6</sup> and/or reproductive interference<sup>3</sup>. However, we know little about the general tempo and  
26 timing of ecological trait divergence for allopatrically speciating pairs, and how these factors impact  
27 transitions from allopatry to sympatry. Here, we combine divergence time estimates, trait measurements,  
28 and geographic range data for 952 avian sister species pairs worldwide to examine the tempo and timing  
29 of ecological trait divergence, and how such divergence may impact the three-stage speciation process.  
30 Our analyses indicate that sister pair divergences in body mass and beak morphology, important  
31 ecological traits, are better explained by a pulse-and-stasis evolution model than a gradual divergence  
32 model. For sister pairs in secondary contact, body mass divergence and beak divergence are associated

33 with earlier transitions to sympatry. Our evidence suggests that the contribution of trait divergence to the  
34 transition to sympatry stems from pulses of trait divergence early in the speciation process, with a  
35 limited contribution from gradual trait divergence. Incorporating early trait divergence pulses of varying  
36 magnitude into the three-stage speciation model can explain a perplexing set of observations in bird  
37 speciation: prolonged mutual exclusion in some older species pairs, marked geographic divergence early  
38 in speciation, and instances of rapid sympatry<sup>7</sup>.

39

## 40 **TEXT**

41 The relative importance and role of gradual versus pulsed trait evolution in generating diversity  
42 continues to be part of a long-lasting debate in evolutionary biology<sup>8-10</sup>. Pulses have been described and  
43 modeled as near-instantaneous jumps separated by relatively long periods of relative stasis, while  
44 gradual evolution often has been modeled as a random walk. While both gradual and pulsed evolution  
45 almost certainly occur, a central question in evolutionary biology is which has greater importance in the  
46 generation of broad patterns of diversity. A challenge in this debate is that support for different models  
47 likely varies with the temporal scale of analysis. At the coarse temporal scales typical of phylogenetic  
48 studies of extant taxa, near-instantaneous pulsed evolution interspersed with relative stasis may be  
49 difficult to characterize because the signal of pulses can blur into gradualism. Meanwhile, pulses  
50 observed over short microevolutionary (population-level) scales may not contribute strongly to the trait  
51 variation evident at macroevolutionary levels<sup>11, 12</sup>.

52 Many proponents of the pulsed evolution model have argued that evolutionary change is  
53 concentrated at speciation. As this hypothesis predicts that evolutionary change depends on the number  
54 of speciation events instead of clade age in phylogenies, studies have tested this hypothesis on  
55 phylogenetic trees, finding some support for speciation-associated pulses<sup>13-16</sup>. However, an issue with  
56 parsing evolutionary change between cladogenesis (speciation) and anagenesis (within-lineage  
57 evolution) from phylogenetic trees is that speciation events are represented as instantaneous events in  
58 the tree. Speciation may instead comprise a series of processes that vary in duration<sup>1</sup> – sometimes  
59 referred to as the speciation continuum<sup>17</sup>. Change in ecological traits may be gradual or pulsed within  
60 this period, and could occur early<sup>18</sup> or late<sup>5</sup> in the process.

61 In the allopatric speciation model thought to represent the most common path to speciation in  
62 vertebrates, there are three phases: allopatry (geographic isolation), secondary contact, and sympatry  
63 (coexistence over substantial area<sup>19</sup>). If speciation is a non-instantaneous process with these phases, we  
64 can ask about the mode of trait divergence over the course of speciation. Even when evolutionary

65 change appears concentrated at cladogenesis (speciation) in phylogenetic studies, this pattern could  
66 result from relatively higher rates of gradual change over the duration of speciation, or it could result  
67 from qualitatively different near-instantaneous pulses that break up periods of stasis. Interestingly,  
68 divergence during the three-stage allopatric speciation model is often depicted as<sup>7</sup> or implicitly assumed  
69 to be<sup>20</sup> a continuous, gradual process. However, authors have additionally noted a decoupling of  
70 phenotypic and molecular divergence rates over the timescales relevant to speciation processes<sup>7</sup>,  
71 suggesting that phenotypic divergence may not be gradual over the course of speciation. If pulse-and-  
72 stasis tempos, instead of gradualism, predominate even on the relatively short timescale of speciation,  
73 there are consequences for how we view the three-stage allopatric speciation process. For example, as  
74 we expect that sympatry must wait for ecological and/or reproductive trait divergence to accrue<sup>21</sup>, the  
75 gradual trait divergence model of allopatric speciation suggests that rapid sympatry should generally be  
76 possible only in those clades with the fastest rates of gradual divergence. If pulses generally occur early  
77 during the speciation process, rapid sympatry may be expected to follow pulses of larger magnitude  
78 instead of being a product of high background rates of gradual divergence. What is needed is an  
79 approach that allows us to examine evidence for the mode and timing of divergence across the allopatric  
80 speciation process for traits that play a role in mediating transitions through this process.

81 Here we leverage the variation in phenotypic divergence, divergence times, and geographic  
82 stages of speciation among 952 bird species pairs to assess the divergence mode of traits associated with  
83 the establishment of sympatry. As we were interested in making inferences that are general across birds,  
84 we extracted species pairs from a global phylogeny of birds with 6,714 species as tips<sup>22</sup> (see  
85 Supplementary Information). Competition<sup>6</sup> and reproductive interference<sup>23, 24</sup> can prevent the  
86 coexistence of incipient and recent species<sup>4</sup>, thus variation in trait divergence should predict which  
87 species pairs in secondary contact are sympatric (coexisting) versus parapatric (having abutting  
88 distributions). Ecological trait divergence should be especially important in mediating sympatry, as it  
89 can ease both competition and reproductive interference<sup>18, 25</sup>. We found that divergence in ecological  
90 traits is associated with coexistence, as disparity in both body mass (a composite ecological trait) and  
91 bill morphology (a foraging-associated trait) predicted sympatry for species pairs in secondary contact  
92 ( $n = 441$ ) across a set of analyses (relative importance = 1 and estimated coefficients > 0 for both trait  
93 divergence predictors in multi-model generalized linear modeling approach; Fig. 1, Supplementary  
94 Tables 4-5, 8-9, 15-16; see Methods). These analyses further accounted for variation among species  
95 pairs in divergence time, latitude, migratory behavior, and dispersal (via a morphological proxy).

96 Our results are in accordance with previous findings in birds (body mass<sup>26</sup>, beak morphology<sup>20</sup>),  
97 in suggesting that ecological trait divergence facilitates coexistence. However, the association of trait  
98 divergence and sympatry was not as consistent across variants of our analyses for beak morphology as it  
99 was for body mass (Fig. 2, Supplementary Tables 4-5, 8-9, 15-16). Body size differences therefore  
100 appear to be paramount, with divergence in the foraging trait (beak) being secondary. As divergence  
101 time was also an important predictor (relative importance = 1 in multi-modeling framework, Fig. 1) of  
102 sympatry for sister pairs in secondary contact, our results suggest that trait divergence and divergence  
103 time are decoupled to some degree, in that ecological trait divergence predicts the outcome of secondary  
104 contact while controlling for the role of divergence time.

105 To better understand the role of trait divergence in transitions through three-stage allopatric  
106 speciation, we sought to understand the tempo and timing of trait divergence relative to the  
107 establishment of secondary contact and sympatry. Thus, we explored a set of evolutionary models to  
108 understand the mode of ecological trait divergence at the timescale of speciation. Different modes of  
109 divergence (gradual versus pulsed) leave different signatures across sets of species pair divergence times  
110 and trait disparities. We considered four divergence models<sup>12</sup> to explain body mass disparities and the  
111 component (phylogenetic PC1<sup>27</sup>) of beak morphology associated with sympatry in the main analysis.  
112 One model is a pure white noise model in which trait disparity is independent of sister pair age, and the  
113 remaining three models combine a white noise component, representing bounded evolution on short  
114 timescales, with alternate longer timescale components. The longer-timescale components are either  
115 gradual (Brownian motion) or pulsed evolution (where disparity arises through a single or multiple  
116 pulses), with the pulse rate determined by a Poisson process. Using AIC to compare models for both  
117 traits, we find strongest relative support for models with a single divergence pulse (Supplementary  
118 Tables 10-11).

119 In the preferred single pulse models for trait divergence, the mean estimated waiting times to  
120 pulses are ~665,000 years for body mass and ~560,000 years for beaks (Fig. 3 for body mass,  
121 Supplementary Tables 10-11). Comparing these estimates with the timing of secondary contact and  
122 sympatry in allopatric speciation, it is evident that trait divergence pulses largely precede sympatry (Fig.  
123 3). Divergence pulses may precede even secondary contact in most cases (Extended Data Fig. 1);  
124 however, we find that secondary contact is frequent in young sister pairs. Indeed, across species pairs,  
125 the estimated intercept for the linear relationship between divergence time and the probability of  
126 breeding co-occurrence is .434 (Extended Data Fig. 2), which requires an approximate minimum rate of  
127 transition to secondary contact from allopatry of 0.3 per million years (Extended Data Fig. 3,

128 Supplementary Information). While our evidence suggesting that sympatry follows (via ecological  
129 sorting) rather than causes (via character displacement<sup>26</sup>) trait divergence is in line with a recent study in  
130 minimally dispersive birds<sup>20</sup>, our results suggest that ecological sorting of previously diverged taxa is a  
131 more general pattern across bird diversity, despite strong dispersal in many taxa.

132 Additionally, under the single pulse model preferred here, an early divergence pulse is followed  
133 by stasis. The magnitude of infrequent pulses may therefore have a central importance in downstream  
134 processes. For incipient species separated by low-magnitude pulses of ecological traits, little substantial  
135 additional divergence is likely to accrue via gradual evolution. Hence, whereas under gradual  
136 divergence models the eventual establishment of sympatry is expected to be facilitated by the  
137 continuous divergence of traits, stasis instead of gradualism may be the dominant evolutionary mode  
138 through time over the course of the three-stage allopatric speciation model. As a consequence, species  
139 pairs differentiated by low-magnitude pulses of ecological trait divergence may be more subject to  
140 prolonged periods of mutual exclusion. As mutual exclusion prohibits range expansion<sup>3, 7</sup>, minimally  
141 ecologically differentiated incipient species may generally have smaller range sizes and higher  
142 probabilities of extinction<sup>28</sup>. These results then suggest that the extinction of minimally ecologically  
143 differentiated incipient (or recent) species may be an important dynamic in shaping diversity. At the  
144 other end of the divergence spectrum, instances of strong ecological trait divergence coupled with rapid  
145 sympatry are evident in nature<sup>29</sup>. While such cases are often treated in the literature as exceptional  
146 instances of atypical speciation, such events are an expected, if relatively low-frequency, outcome of an  
147 allopatric speciation model with divergence pulses.

148 We note that gradual divergence models can account for prolonged mutual exclusion between  
149 highly similar species when divergence is slow. However, gradual divergence cannot simultaneously  
150 account for highly divergent taxon pairs with rapid sympatry unless brief bursts of exceptionally fast  
151 gradual divergence (mimicking pulses) are invoked. A general model for bird speciation that instead  
152 incorporates a pulse-and-stasis mode for traits helps to rectify observations from nature that may  
153 otherwise appear to arise from fundamentally different processes. Under the pulse-and-stasis model of  
154 allopatric speciation we advocate here, instances of rapid sympatry coupled with strong trait divergence  
155 are expected, as are instances of prolonged mutual exclusion between highly similar species.

156 We suggest that our results point to an important question in speciation: what is the relevance  
157 and role of pulses of phenotypic evolution in speciation? We propose that our results are consistent with  
158 the ‘Ephemeral Divergence’ model<sup>30</sup> in which ‘successful’ speciation can translate the origin of forms  
159 below the species level into their long-term persistence. Here we interpret the establishment of

160 sympatry as a measure of speciation *success*<sup>5</sup>. Transitions to sympatry indicate that range expansion has  
161 been achieved by one or both members of a species pair. Such range expansions may decrease the  
162 probability of extinction and better the prospects of subsequent geographic speciation<sup>28</sup> for incipient  
163 species. In our species pair data set, parapatric ranges are indicative of mutual exclusion, with range  
164 expansion prevented. Species in these circumstances may be more subject to near-term extinction than  
165 those that have expanded ranges into sympatry. Our evidence then suggests that ecological trait  
166 divergence pulses of large magnitude may disproportionately contribute to the emergent patterns of  
167 diversity at longer time-scales.

168

## 169 **METHODS SUMMARY**

170 Using a sister species pair data set of 952 pairs sampled from across avian diversity, we examined 1) the  
171 timing and outcomes of secondary contact, and 2) the mode and timing of ecological trait divergence.  
172 We determined whether sister pairs had established secondary contact by scoring local co-occurrence  
173 from site-based inventories<sup>31</sup> and whether sister pairs had established sympatry by scoring range overlap  
174 from range maps<sup>32</sup>. Using multi-model inference of generalized linear models (GLM), we analyzed how  
175 variation in environment (latitude), life history (migratory versus sedentary behavior), ecological trait  
176 differences (divergence in body mass and beak morphology), and a proxy for dispersal capacity (hand-  
177 wing index) explain variation in the timing of secondary contact and sympatry. Sympatry was defined  
178 by range overlap of >10% of the smaller of the two species' ranges (>20% in sensitivity analyses), with  
179 overlap calculated using spatial data libraries in R. Latitude was calculated from sets of occurrence  
180 records<sup>33</sup>. Migratory behavior information was sourced from the natural history literature<sup>34</sup>, and body  
181 mass data was compiled from the literature<sup>35,36</sup>. Beak morphology and a morphological index for  
182 dispersal capacity (hand-wing index) were measured from museum specimens. To aid in the  
183 interpretation of an initial result indicating that the intercept of the relationship between the probability  
184 of local co-occurrence and divergence time is unexpectedly high, we used simulations of range  
185 dynamics that model transitions into and out of secondary contact from an initially allopatric  
186 configuration<sup>37</sup>. We analyzed the mode and timing of ecological trait divergence by fitting evolutionary  
187 models incorporating short-term and long-term processes, reflecting bounded evolution over short  
188 periods and gradual or pulsed divergence over the longer periods<sup>12</sup>. We estimated divergence times  
189 using a novel set of 20 fossil calibrations for a maximum likelihood phylogeny of 6,714 bird species.  
190 We show that our results are robust to different approaches to phylogenetic inference and dating by  
191 performing parallel analyses with an alternate time-calibrated phylogeny<sup>38</sup>. Analyses and data

192 visualizations were performed in R using a range of packages, including ‘glmulti’ for generalized linear  
193 model generation and selection; ‘phytools’ and ‘diversitree’ for phylogenetic comparative analyses;  
194 ‘rgdal’, ‘rgeos’, and ‘raster’ for GIS analyses; and ‘maxLik’ for likelihood searches of evolutionary  
195 divergence models.

196

## 197 **Acknowledgements**

198 We are grateful to numerous data collectors who contributed to eBird, GenBank, the CRC bird body  
199 mass data set (see Supplementary Information for further details). Catherine Sheard, Monte Neate-Clegg  
200 and Sam Jones measured morphometric traits from museum specimens, and Dan Ksepka, Rebecca  
201 Kimball, and Ed Braun helped with dating the phylogenetic tree. Aaron Ragsdale and Gleb Zhelezov  
202 assisted with likelihood calculations for the body mass divergence analyses; Alex Pigot helped with  
203 models of range dynamics. This work was supported by the National Science Foundation (DEB-  
204 1208428 to J.G.B.) and Natural Environment Research Council (NE/ I028068/1 to J.A.T.).

205

206 **Author contributions** J.G.B. and J.P.M. conceived and designed the study; J.G.B. performed dating  
207 analyses and assembled phylogenetic, occurrence, and body mass information; J.A.T. provided  
208 morphometric data; J.P.M. integrated data sets, and designed and performed statistical analyses with  
209 significant input from J.G.B.; J.P.M. produced figures and tables; J.P.M. wrote the manuscript, with  
210 significant input from J.A.T. and J.G.B.

211

212 **Author Information** Reprints and permissions information is available at [www.nature.com/reprints](http://www.nature.com/reprints).

213 The authors declare no competing financial interests. Readers are welcome to comment on the online  
214 version of this article at [www.nature.com/nature](http://www.nature.com/nature). Correspondence and requests for materials should be  
215 addressed to [jaymcentee@ufl.edu](mailto:jaymcentee@ufl.edu).

216

## 217 **References**

218

- 219 1. Mayr, E. in *Systematics and the Origin of Species* (Columbia University Press, 1942).
- 220 2. Price, T. D. *et al.* Niche filling slows the diversification of Himalayan songbirds. *Nature* **509**, 222-+  
221 (2014).
- 222 3. Weir, J. T. & Price, T. D. Limits to speciation inferred from times to secondary sympatry and ages of  
223 hybridizing species along a latitudinal gradient. *Am. Nat.* **177**, 462-469 (2011).
- 224 4. Pigot, A. L. & Tobias, J. A. Species interactions constrain geographic range expansion over  
225 evolutionary time. *Ecol. Lett.* **16**, 330-338 (2013).
- 226 5. Rundell, R. J. & Price, T. D. Adaptive radiation, nonadaptive radiation, ecological speciation and  
227 nonecological speciation. *Trends in Ecology & Evolution* **24**, 394-399 (2009).

- 228 6. MacArthur, R. & Levins, R. The limiting similarity, convergence, and divergence of coexisting  
229 species. *Am. Nat.*, 377-385 (1967).
- 230 7. Price, T. in *Speciation in birds* (Roberts and Company, Greenwood, Village, Colorado, 2008).
- 231 8. Gould, N. E. J. Punctuated equilibria: an alternative to phyletic gradualism. (1972).
- 232 9. Gould, S. J. & Eldredge, N. Punctuated equilibria: the tempo and mode of evolution reconsidered.  
233 *Paleobiology* **3**, 115-151 (1977).
- 234 10. Pennell, M. W., Harmon, L. J. & Uyeda, J. C. Is there room for punctuated equilibrium in  
235 macroevolution? *Trends in ecology & evolution* **29**, 23-32 (2014).
- 236 11. Estes, S. & Arnold, S. J. Resolving the paradox of stasis: Models with stabilizing selection explain  
237 evolutionary divergence on all timescales. *Am. Nat.* **169**, 227-244 (2007).
- 238 12. Uyeda, J. C., Hansen, T. F., Arnold, S. J. & Pienaar, J. The million-year wait for macroevolutionary  
239 bursts. *Proc. Natl. Acad. Sci. U. S. A.* **108**, 15908-15913 (2011).
- 240 13. Eldredge, N. The allopatric model and phylogeny in Paleozoic invertebrates. *Evolution* **25**, 156-167  
241 (1971).
- 242 14. Pagel, M., Venditti, C. & Meade, A. Large punctuational contribution of speciation to evolutionary  
243 divergence at the molecular level. *Science* **314**, 119-121 (2006).
- 244 15. Bokma, F. Time, species, and separating their effects on trait variance in clades. *Syst. Biol.* **59**, 602-  
245 607 (2010).
- 246 16. Rabosky, D. L. & Adams, D. C. Rates of morphological evolution are correlated with species  
247 richness in salamanders. *Evolution* **66**, 1807-1818 (2012).
- 248 17. Pereira, R. J. & Wake, D. B. Ring species as demonstrations of the continuum of species formation.  
249 *Mol. Ecol.* **24**, 5312-5314 (2015).
- 250 18. Rundle, H. D. & Nosil, P. Ecological speciation. *Ecol. Lett.* **8**, 336-352 (2005).
- 251 19. Lack, D. Ecological aspects of species-formation in passerine birds. *Ibis* **86**, 260-286 (1944).
- 252 20. Tobias, J. A. *et al.* Species coexistence and the dynamics of phenotypic evolution in adaptive  
253 radiation. *Nature* **506**, 359-+ (2014).
- 254 21. Mayr, E. in *Animal Species and Evolution* (Belknap Press of Harvard University Press, Cambridge,  
255 Massachusetts, 1963).
- 256 22. Burleigh, J. G., Kimball, R. T. & Braun, E. L. Building the avian tree of life using a large-scale,  
257 sparse supermatrix. *Mol. Phylogenet. Evol.* **84**, 53-63 (2015).
- 258 23. Hochkirch, A., Groening, J. & Buecker, A. Sympatry with the devil: reproductive interference could  
259 hamper species coexistence. *J. Anim. Ecol.* **76**, 633-642 (2007).
- 260 24. Groening, J. & Hochkirch, A. Reproductive interference between animal species. *Q. Rev. Biol.* **83**,  
261 257-282 (2008).
- 262 25. Podos, J. Correlated evolution of morphology and vocal signal structure in Darwin's finches. *Nature*  
263 *(London)* **409**, 185-188 (2001).
- 264 26. Bothwell, E., Montgomerie, R., Loughheed, S. C. & Martin, P. R. Closely related species of birds  
265 differ more in body size when their ranges overlap-in warm, but not cool, climates. *Evolution* **69**, 1701-  
266 12 (2015).
- 267 27. Revell, L. J. Size-correction and principal components for interspecific comparative studies.  
268 *Evolution* **63**, 3258-3268 (2009).
- 269 28. Rosenzweig, M. L. in *Species diversity in space and time* (Cambridge University Press, 1995).
- 270 29. Schluter, D. in *The ecology of adaptive radiation* (Oxford University Press, Oxford, UK, 2000).
- 271 30. Futuyma, D. J. Evolutionary constraint and ecological consequences. *Evolution* **64**, 1865-1884  
272 (2010).
- 273 31. Sullivan, B. L. *et al.* The eBird enterprise: An integrated approach to development and application of  
274 citizen science. *Biol. Conserv.* **169**, 31-40 (2014).



- 275 32. BirdLife International and NatureServe. in *Bird species distribution maps of the world* (BirdLife  
276 International and NatureServe, Cambridge, UK and Arlington, USA, 2014).  
277 33. Sullivan, B. L. *et al.* eBird: A citizen-based bird observation network in the biological sciences. *Biol.*  
278 *Conserv.* **142**, 2282-2292 (2009).  
279 34. *Handbook of the Birds of the World Alive* (eds del Hoyo, J., Elliott, A., Sargatal, J., Christie, D. A. &  
280 de Juana, E.) (Lynx Edicions, Barcelona, 2015).  
281 35. Dunning, J. B. in *Body masses of birds of the world* (Taylor and Francis Group, Boca Raton, Florida,  
282 2008).  
283 36. <https://ag.purdue.edu/fnr/Documents/WeightBookUpdate.pdf>.  
284 37. Pigot, A. L. & Tobias, J. A. Dispersal and the transition to sympatry in vertebrates. *Proceedings of*  
285 *the Royal Society of London B: Biological Sciences* **282**, 20141929 (2015).  
286 38. Jetz, W., Thomas, G. H., Joy, J. B., Hartmann, K. & Mooers, A. O. The global diversity of birds in  
287 space and time. *Nature* **491**, 444-448 (2012).  
288

## 289 METHODS

290 **Sister pairs** We initially selected sister species pairs (2,076 initial pairs) from the maximum likelihood  
291 topology of Burleigh *et al.*'s<sup>22</sup> avian supermatrix phylogenetic tree (hereafter “Burleigh tree”), which  
292 contains 6,714 species of the ~10,500 bird species in the world  
293 (<http://www.birds.cornell.edu/clementschecklist/>). This selection excluded species that are sister to  
294 clades of >1 species, which generated a manageable sample for downstream data quality checks while  
295 still allowing for adequate sampling for statistical analysis. To exclude pairs that may not represent  
296 “true” sister species, we reduced this data set by retaining only those sister pairs belonging to genera  
297 with  $\geq 75\%$  species-level sampling in the Burleigh tree (excluding 763 pairs), then examined evidence  
298 for sister relationships for species belonging to different genera and removed species pairs unlikely to be  
299 true sister species. The final lists of included (SI Dataset 1) and excluded species pairs (SI Dataset 7) are  
300 presented in the Supplementary Information, with exclusion criteria specified for all excluded pairs.

301 **Divergence times** The divergence time estimates from the Burleigh tree were obtained from a penalized  
302 likelihood analysis implemented in r8s<sup>39</sup>, using the maximum likelihood topology and molecular branch  
303 lengths from the Burleigh *et al.* supermatrix tree<sup>22</sup>. We used twenty carefully vetted fossil calibrations  
304 across avian diversity, and we further constrained the root of the tree to a maximum age of 110 mya  
305 (although the age constraint of the root made little difference to the estimated sister pair divergence  
306 times, Extended Data Fig. 4). A list of the fossil calibrations (Supplementary Information Dataset 6) and  
307 a command block for the r8s analyses are available in the Supplementary Information. We performed  
308 sensitivity analyses using alternate sets of divergence time estimates, both from bootstrap analysis of the  
309 Burleigh *et al.* tree<sup>22</sup> and from an independent phylogenetic and dating analysis<sup>38</sup> (see Supplementary  
310 Information and e.g. Extended Data Figs. 5, 6, and 10).

311 **Ecological trait measurements** *Body mass* Divergence in body size may be a strong contributor to  
312 ecological divergence between species, which could reduce competition between species<sup>29, 40</sup>. In this  
313 study, we use body mass as a proxy for body size. Body mass data were compiled from a published  
314 global dataset<sup>35</sup> and a recent update<sup>36</sup>. If multiple body mass values were reported, we took the mean,  
315 and if male and female body masses were reported separately, we used the mean of the male and female  
316 mean body mass values. Our body mass disparity scores were calculated as the difference between  
317 species in natural log of mean body mass<sup>12</sup>.

318 *Beak morphology* To quantify similarity in foraging ecology among sister species, we focused on three  
319 beak measurements (culmen length, beak depth, and beak width) associated with foraging niche and  
320 prey item selection<sup>4, 41, 42</sup>. Culmen length was measured as the distance from the distal part of the nostril  
321 to the beak tip. Beak depth and beak width were both measured at the distal part of the nostril. All beak  
322 measurements were made to the nearest 0.1mm. See Supplementary Information for further details and  
323 rationale. To account for colinearity between beak measurements, we performed a phylogenetic  
324 Principal Components Analysis (phylogenetic PCA<sup>27</sup>; see Supplementary Table 1 for PC loadings)  
325 before analyzing the role of beak morphology divergence in transitions to secondary contact and  
326 sympatry.

327 **Secondary contact** For a given species pair, local co-occurrence was defined as the occurrence of both  
328 species on the same day at the same reported coordinates. All sister species pairs for which local co-  
329 occurrence has been documented were considered to have established secondary contact. We estimated  
330 co-occurrence using ~178 million bird species observation records stored in the eBird observational  
331 record database<sup>33, 43</sup>. Because co-occurrence is unlikely to be reported for species with very few  
332 observations, we excluded sister pairs where at least one species had <10 eBird sightings reported. This  
333 threshold is low, as even after this filtering, the minimum number of observations strongly predicts the  
334 probability of species pair local co-occurrence in our data set (GLM with the log of the minimum  
335 observations as sole predictor: coefficient estimate =  $3.8 \times 10^{-4} \pm 8.5 \times 10^{-5}$  SE, see Supplementary  
336 Information). Consequently, we conducted sensitivity analyses adopting minima of 20 and 50  
337 observations (see Extended Data Fig. 7; Supplementary Tables 11-14). We also checked observational  
338 evidence for co-occurrence, discounting cases likely attributable to anthropogenic introductions, and  
339 excluding cases potentially based on misidentifications or taxonomic confusion (see included and  
340 excluded species pairs in Datasets 1 and 7).

341 **Dispersal** We hypothesized that secondary contact may occur more quickly for highly dispersive taxa  
342 because greater dispersal capacities should result in faster range expansions in nascent species<sup>44</sup>. Some

343 authors have suggested that this rapid resumption of contact in highly dispersive taxa may serve to slow  
344 or reverse the speciation process by permitting gene flow, instead of accelerating the eventual transition  
345 to sympatry<sup>21</sup>. However, a recent study indicated that increased dispersal capacity is associated with  
346 faster transition rates from non-sympatry (either allopatry or parapatry) to sympatry in vertebrates<sup>37</sup>. Our  
347 study attempts to separate the transitions from allopatry to secondary contact, and secondary contact to  
348 sympatry, to examine whether there are separate effects of dispersal capacity for either transition.  
349 As it is difficult to measure dispersal capacity directly, here we use a proxy for flight performance that is  
350 in turn correlated with natal dispersal distance<sup>45</sup>. Wings with high aspect ratio are associated with  
351 efficient long-distance flight. Thus, to quantify dispersal capacity we used an index of wing shape  
352 related to the aspect ratio of the wing<sup>44</sup>:

$$\text{Hand - wing index} = 100 \times \frac{WL - SL}{WL}$$

353 where WL (wing length) is the standard length of the closed wing, and SL (secondary length) is the  
354 distance from the carpal joint to the tip of the first secondary feather (both measurements were made to  
355 the nearest mm).

356 **Geographic configurations** We calculated percent breeding range overlap from range polygons<sup>32</sup> with  
357 a custom R script, using the R libraries `rgdal`, `rgeos`, `maptools`, and `raster`. Species pairs with a range  
358 overlap >10% of the smaller range<sup>37</sup> were scored as sympatric. Sensitivity analyses were performed  
359 where overlap of >20% was scored as sympatric (Supplementary Tables 16-17).

## 360 **Analyses**

361 **Secondary contact and sympatry** We examine the probability of local co-occurrence, breeding range  
362 local co-occurrence, and sympatry versus parapatry using GLM with binomial error distributions,  
363 implemented in R<sup>46</sup>. We distinguished evidence for breeding range local co-occurrence from other local  
364 co-occurrence observations by checking the dates and localities of co-occurrence records against  
365 breeding phenology<sup>34</sup> and breeding range maps<sup>32</sup>. Our criteria for evidence of breeding range local co-  
366 occurrence were that co-occurrences had to take place during known breeding seasons of both species<sup>34</sup>,  
367 within the known breeding range of one of the two species<sup>32</sup>.

368 In analyses of local co-occurrence and breeding local co-occurrence for sister pairs, we began by  
369 predicting the probability of co-occurrence with divergence time as the only predictor (Fig. 1a-b and  
370 Extended Data Fig. 2). We subsequently performed a model generation and selection routine (the  
371 genetic algorithm of R package `glmulti`<sup>47</sup>, see Supplementary Information) to examine which among a  
372 set of phenotypic measures and an environmental variable (latitude) best predict local co-occurrence or  
373 sympatry while accounting for the effects of divergence time. Our model generation routine permitted

374 all pairwise interactions between predictors to enter the model, under the constraint that all models were  
375 marginal. We included as predictors the between-species disparity in two ecologically important traits  
376 that have also been associated with mate choice in birds: body mass<sup>48</sup> and beak morphology<sup>49</sup>. We  
377 incorporated disparity in beak morphology between sister species in one of two ways: either as the  
378 Euclidean distance between species in PC space (following scaling of all PC's to unit variance) or by  
379 including species differences along each PC axis as separate predictors. To account for differences  
380 among sister species pairs in dispersal ability, we include the average hand-wing index<sup>44</sup> of the sister  
381 pair in GLM. We further included divergence time, latitude (average of the two median observational  
382 latitudes for each species from eBird), and migratory status (if either member of a species pair is  
383 migratory to any degree according to species range maps, the pair is scored as migratory; otherwise they  
384 are scored as non-migratory). We report support for all predictors entering the set of local co-occurrence  
385 models with  $\Delta AIC < 2$  (Supplementary Tables 2-3). All continuous variables were scaled and centered,  
386 such that estimated slope magnitudes for individual variables are meaningful in relation to one another.

387 For GLM examining the probability of sympatry versus parapatry, we first limited the sister  
388 species data set to those pairs that locally co-occur in breeding ranges. This restriction removes clades  
389 for which sister interactions are not the primary determinant of breeding sympatry, and focuses the  
390 analysis instead on those taxa that interact to some degree<sup>50</sup>. We then categorized the ranges of locally  
391 co-occurring sister species as parapatric or sympatric by calculating overlap from species range maps<sup>32</sup>,  
392 using a cutoff of 10% range overlap of the smaller range<sup>37</sup> (as any range overlap cutoff to designate  
393 sympatry is arbitrary, we performed sensitivity analyses using a cutoff of 20%, see Supplementary  
394 Information). The response variable in GLM is the geographic configuration: parapatric (interacting but  
395 without substantial range overlap) versus sympatric. We again used a genetic algorithm (see  
396 Supplementary Information) to generate model variants and performed model selection using the R  
397 package `glmulti`<sup>47</sup>.

398 To check the sensitivity of our results to the divergence time estimates we used, we repeated all  
399 GLM analyses using mean divergence times for our species pairs from 100 samples of the pseudo-  
400 posterior distribution of phylogenies of Bayesian species-level phylogenetic analysis for birds<sup>38</sup> (SI  
401 Tables S6-S9). For analyses examining the probability of local co-occurrence (and breeding local co-  
402 occurrence) with divergence time, we additionally performed exhaustive sensitivity analyses employing  
403 divergence time estimates from 100 bootstraps of the Burleigh tree and for each of the 10,000 pseudo-  
404 posterior samples from the Jetz et al. analyses.

405 *Tempo of body mass divergence*

406 In our GLM analyses, we find that increased body mass disparity and beak morphology (phylogenetic  
407 PC1) are associated with increased probability of sympatry among pairs that have come into contact  
408 (Fig. 1, Supplementary Tables 4-5, 8-9, 15-16). This result occurs while controlling for divergence time,  
409 suggesting that increased body mass and beak morphology disparity accelerate the establishment of  
410 sympatry. But the result raises the issue of how body mass disparity accrues in sister pairs of birds. If  
411 body mass accrual is gradual, then there should be little potential for body mass divergence to impact  
412 transitions from secondary contact to sympatry shortly following divergence. However, if body mass  
413 disparity more typically accrues in rapid pulses, such pulses could affect transitions to sympatry shortly  
414 following divergence if they frequently occur before secondary contact. To examine the tempo and  
415 timing of body mass and beak PC1 divergence then, we investigated the relative support for four models  
416 of divergence for the species pairs from the full dataset for which body mass or beak morphology data  
417 were available ( $n = 872$  species pairs for body mass,  $n = 926$  species pairs for beak morphology). We fit  
418 models of time-independent bounded evolution and three models that include a bounded evolution  
419 component on shorter timescales and an additional component for longer timescales<sup>12</sup>. These longer-  
420 timescale components are a gradual evolution model (Brownian motion) and two forms of pulsed  
421 divergence: a single pulse model where a single instantaneous displacement occurs following a waiting  
422 time sampled from an exponential distribution, and a multiple pulse model where the expected number  
423 of displacements for a given divergence time is determined by a Poisson process. We examine relative  
424 support for these models using AIC from likelihood calculations performed in R.

425

426 *Simulations of range dynamics* To aid in the interpretation of the intercept of local co-occurrence  
427 probability that we calculated from empirical data, we present stochastic simulations of the process of  
428 secondary contact establishment. We used these simulations to place an approximate lower bound on the  
429 rate of secondary contact establishment. To perform this estimation, we simulated the establishment of  
430 secondary contact using a simple model<sup>4, 37</sup>, in which sister pairs can be in one of two states: co-  
431 occurring and not co-occurring. We simulated transitions into and out of contact over a set of possible  
432 rates from 0.1 to 0.8 per million years, in which the forward rate (rate of transition from isolation to  
433 contact,  $\sigma$ ) is always greater than or equal to the reverse rate (rate of transition out of contact,  $\epsilon$ ). The  
434 forward and reverse rates are constant (the Constant-Rate model of<sup>4</sup>, but with reversion to isolation  
435 included), and the variation in rates among species arises only from stochasticity. Reverse rates were  
436 simulated at .005, .01, .05, .1, .2, and .5 times each of the forward rates. We present the maximum  
437 intercept calculated across all reverse rates ( $\epsilon$ ) for each simulated forward rate ( $\sigma$ ) (Extended Data

438 Figure S4). To calculate the approximate percentage of species pairs coming into secondary contact by  
 439 given points in time following divergence (100,000 years, 1 million years), we simulated range  
 440 dynamics with  $\sigma=0.3$ , and  $\varepsilon=.15$  (corresponding to the minimal  $\sigma$  that yielded intercept  $> 0.434$ , and the  
 441 value of  $\varepsilon$  that yielded the highest intercept for  $\sigma=0.3$ ).

442

443 **Figure 1 | Factors associated with the establishment of secondary contact and coexistence in birds**

444 The relative importance of predictors in generalized linear models of the probability of **a, c**, breeding  
 445 season secondary contact and **b, d**, sympatry for two predictor sets. Relative importance is calculated as  
 446 the proportion of the summed model weights for all models in the candidate set (those with  $\Delta AIC < 2$ )  
 447 including the predictor. The relative importance can be interpreted as the overall support for each  
 448 predictor as a key factor in predicting the probability of secondary contact or sympatry across the  
 449 candidate set<sup>47</sup>. Predictors with green bars are positively associated with the probability of co-  
 450 occurrence or sympatry in the superior model of the candidate set when controlling for other variables  
 451 (i.e. predictions are made with other variables set to their means, except divergence time which is set to  
 452 its median and migration which is set to non-migratory; see Supplementary Tables 2–5 and 6-9 for  
 453 multi-model slope estimates for each predictor). Migratory behavior is associated with increased  
 454 probability of breeding co-occurrence, controlling for divergence time. The identity of all pairwise  
 455 interactions with relative importance  $> 0.6$  are indicated by the numbers to the right of each variable's  
 456 importance score.

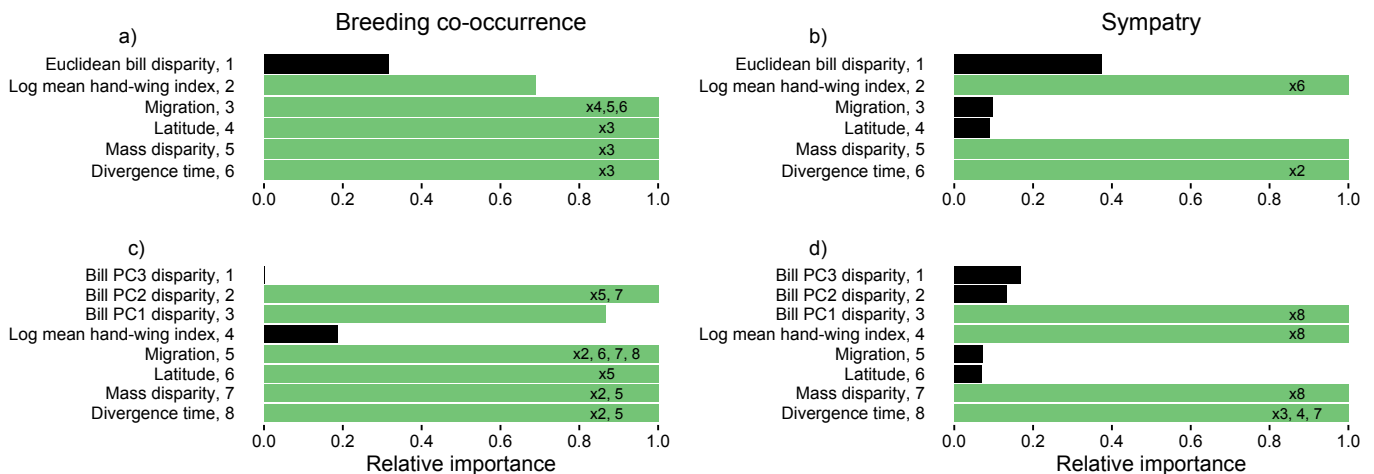

457

458

459 **Figure 2 | Body mass divergence tempo for avian sister species** Stochastic pulsed models of  
 460 evolution (either a single pulse or multiple pulse model) fit species pair log body mass disparities and  
 461 divergence times ( $n = 872$  species pairs) better than a gradual evolution model (Brownian motion) and a

462 white noise model (disparity is independent of divergence time). For any given time slice along the x-  
463 axis, the probability density follows a normal distribution (most apparent in the white noise model  
464 where the probability density distribution is the same at all time slices). In the remaining models,  
465 variance increases with time. Probability densities are normalized within each time slice, such that  
466 relative probability density can be assessed within each time slice (and not across time slices). The  
467 single pulse model is the best fit by AIC ( $\Delta$ AIC over the multiple pulse model: 797), with a fitted mean  
468 waiting time to the pulse of 665,000 years, suggesting that the majority of species pairs in the data set  
469 have incurred a pulse of body mass divergence (see Figure 3). Assuming this model accurately reflects  
470 evolutionary process, species pairs with larger-magnitude pulses of body mass divergence are associated  
471 with higher probabilities of sympatry given secondary contact. The empirical data points are plotted  
472 only on the white noise model, as it is difficult to examine the other fitted models when points are  
473 plotted.

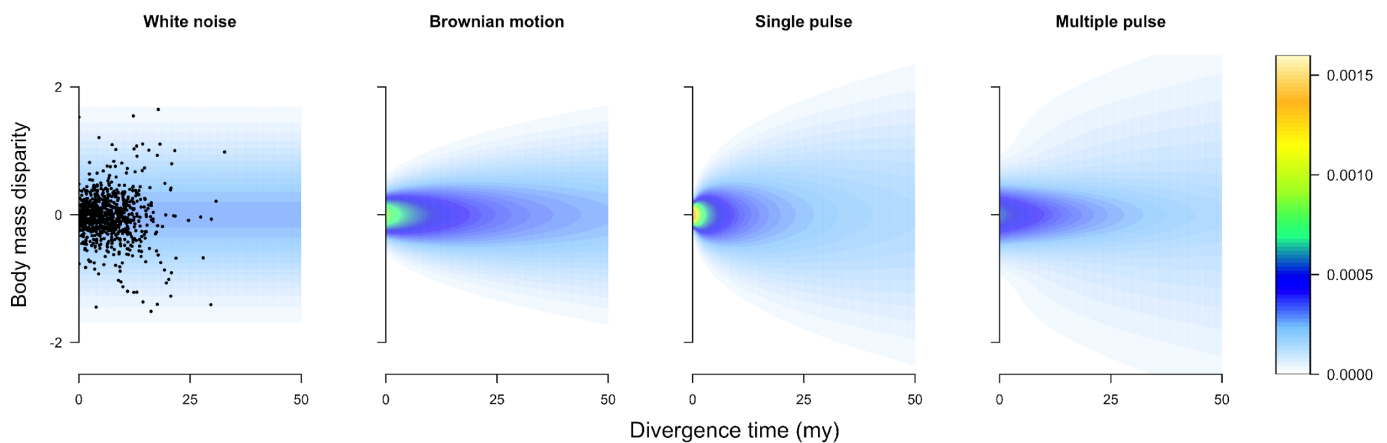

474  
475

476 **Figure 3 | Pulsed body mass divergence and sympatry** The establishment of sympatry occurs  
477 relatively slowly compared to body mass divergence pulses in the preferred single pulse model. The  
478 blue circles are the proportion of sympatric sister pairs for 1-million-year divergence time intervals.  
479 Circle sizes represent sample sizes ( $n$ ) within each 1-million-year interval, with  $n$  shown where  $\geq 50$ .  
480 The gray lines are the cumulative probability distributions (CPD) for having incurred a pulse of body  
481 mass divergence, with each of the 100 lines representing the CPD from a fitted single pulse model using  
482 divergence times from a dated bootstrap phylogeny from a bootstrap analysis of the Burleigh  
483 phylogenetic tree<sup>22</sup>. The variation among the presented lines is indicative of the effect of phylogenetic  
484 uncertainty. The black curves indicate the predicted proportion of sister pairs with body mass  
485 divergence greater than 10% (solid), 20% (dashed), and 30% (dotted) based on the single pulse model

486 fitted with divergence times from the maximum likelihood Burleigh phylogenetic tree<sup>22</sup>. Note the rapid  
487 increase in these proportions at low divergence time and their subsequent leveling off.

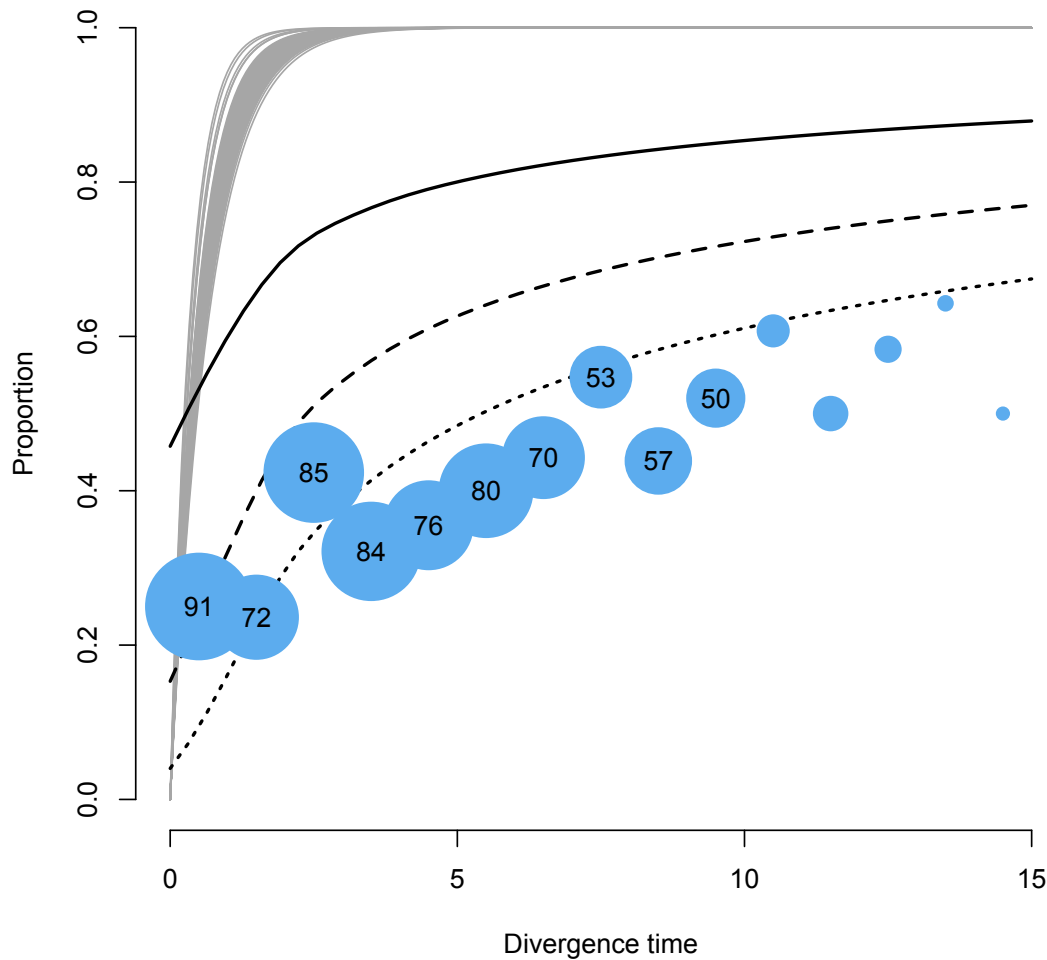

488  
489  
490  
491  
492  
493

- 494 39. Sanderson, M. R8s: Inferring Absolute Rates of Molecular Evolution and Divergence Times in  
495 the Absence of a Molecular Clock. *Bioinformatics* **19**, 301-302 (2003).  
496 40. Wilson, D. S. The Adequacy of Body Size as a Niche Difference. *Am. Nat.* **109**, 769-784 (1975).  
497 41. Schoener, T. W. The Evolution of Bill Size Differences among Sympatric Congeneric Species of  
498 Birds. *Evolution* **19**, 189-213 (1965).  
499 42. Miles, D. B. & Ricklefs, R. E. The Correlation between Ecology and Morphology in Deciduous  
500 Forest Passerine Birds. *Ecology* **65**, 1629-1640 (1984).  
501 43. <http://www.ebird.org>.



- 502 44. Claramunt, S., Derryberry, E. P., Remsen, J. V., Jr. & Brumfield, R. T. High dispersal ability  
503 inhibits speciation in a continental radiation of passerine birds. *Proceedings of the Royal Society B-*  
504 *Biological Sciences* **279**, 1567-1574 (2012).
- 505 45. Dawideit, B. A., Phillimore, A. B., Laube, I., Leisler, B. & Böhning-Gaese, K. Ecomorphological  
506 predictors of natal dispersal distances in birds. *J. Anim. Ecol.* **78**, 388-395 (2009).
- 507 46. R Core Team. R: A language and environment for statistical computing. (2012).
- 508 47. <http://CRAN.R-project.org/package=glmulti>.
- 509 48. Yasukawa, K. Male quality and female choice of mate in the red-winged blackbird (*Agelaius*  
510 *phoeniceus*). *Ecology* **62**, 922-929 (1981).
- 511 49. Grant, P. R. & Grant, B. R. Hybridization, sexual imprinting, and mate choice. *Am. Nat.* **149**, 1-28  
512 (1997).
- 513 50. Lovette, I. J. & Hochachka, W. M. Simultaneous effects of phylogenetic niche conservatism and  
514 competition on avian community structure. *Ecology* **87**, S14-S28 (2006).
- 515

## Extended Data Figures

**Extended Data Figure 1 | Pulsed body mass divergence and secondary contact** The pulsed model of body mass divergence supported in our analyses suggests that most change in body mass occurs close to the outset of speciation. At least some divergence pulses are likely to pre-date secondary contact. The orange circles are the proportion of sister pairs that co-occur during the breeding season for 1-million-year divergence time intervals. Circle sizes represent sample sizes ( $n$ ) within each 1-million-year interval, with  $n$  shown where  $\geq 50$ . The gray lines are the cumulative probability distributions (CPD) for having incurred a pulse of body mass divergence, with each of the 100 lines representing the CPD from a fitted single pulse model using divergence times from a dated bootstrap phylogeny from a bootstrap analysis of the Burleigh phylogeny{{641 Burleigh 2015;}}. The variation among the presented lines is indicative of the role of phylogenetic uncertainty. The black curves indicate the predicted proportion of sister pairs with body mass divergence greater than 10% (solid), 20% (dashed), and 30% (dotted) based on the single pulse model fitted with divergence times from the maximum likelihood Burleigh phylogeny{{641 Burleigh 2015;}}. Note the rapid increase in these proportions at low divergence time, and their subsequent leveling off.

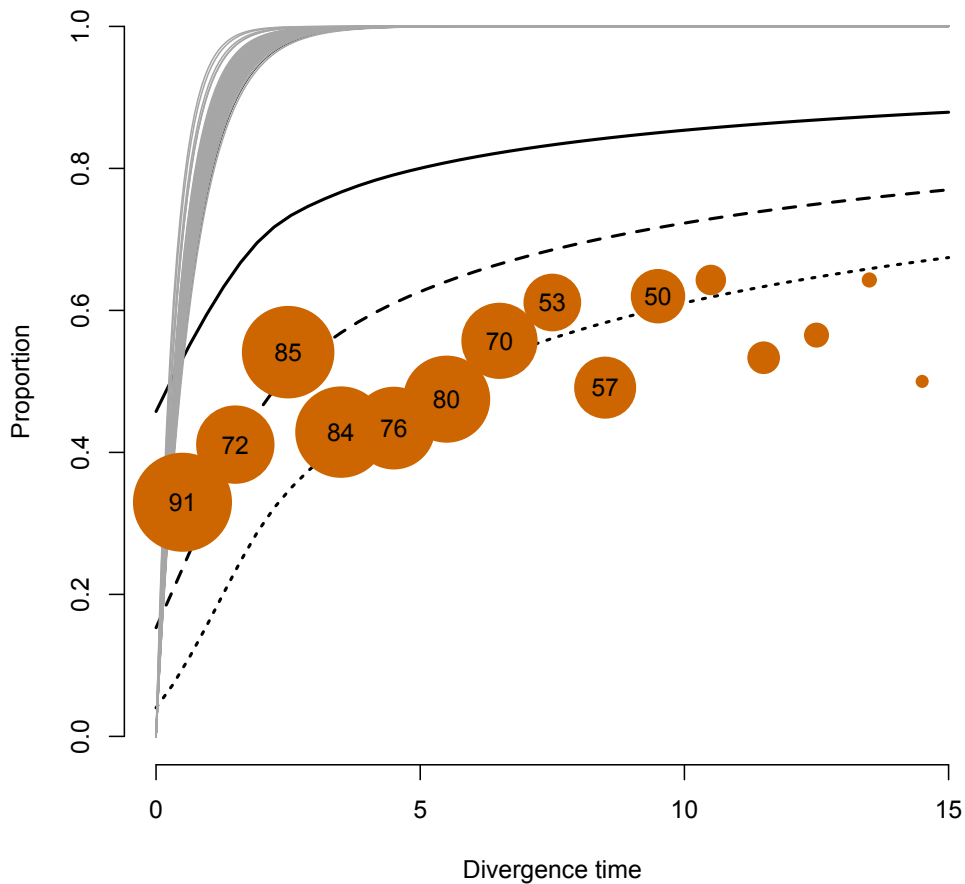

**Extended Data Figure 2 | Patterns of co-occurrence across avian sister species. a,** predicted probability of local co-occurrence and **b,** predicted probability of breeding range local co-occurrence for sister species of birds as a function of divergence time. Divergence time estimates come from a dating analysis of the Burleigh *et al.* supermatrix phylogeny{{641 Burleigh 2015;}}. Points at 0 and 1 on the y-axis are data points from species pairs with “no co-occurrence” or “local co-occurrence” respectively. The non-zero intercepts are not consistent with long-duration (>1 million year) phases of complete geographic isolation being necessary at the outset of speciation across birds{{657 Barraclough,T.G. 2000;}}. **c,** tree showing evolutionary relationships among 952 pairs of sister species included in local co-occurrence analyses, with co-occurrence treated as a binary variable for each pair. Sister pairs with breeding range local co-occurrence are a subset of those with any local co-occurrence. The tree is derived from the Burleigh *et al.* supermatrix phylogeny{{641 Burleigh 2015;}}, pruned to the sister pair dataset. Terminal branches are further pruned such that tips represent the most recent common ancestors of sister species pairs. There is little phylogenetic clustering of co-occurrence of either type (see Text).

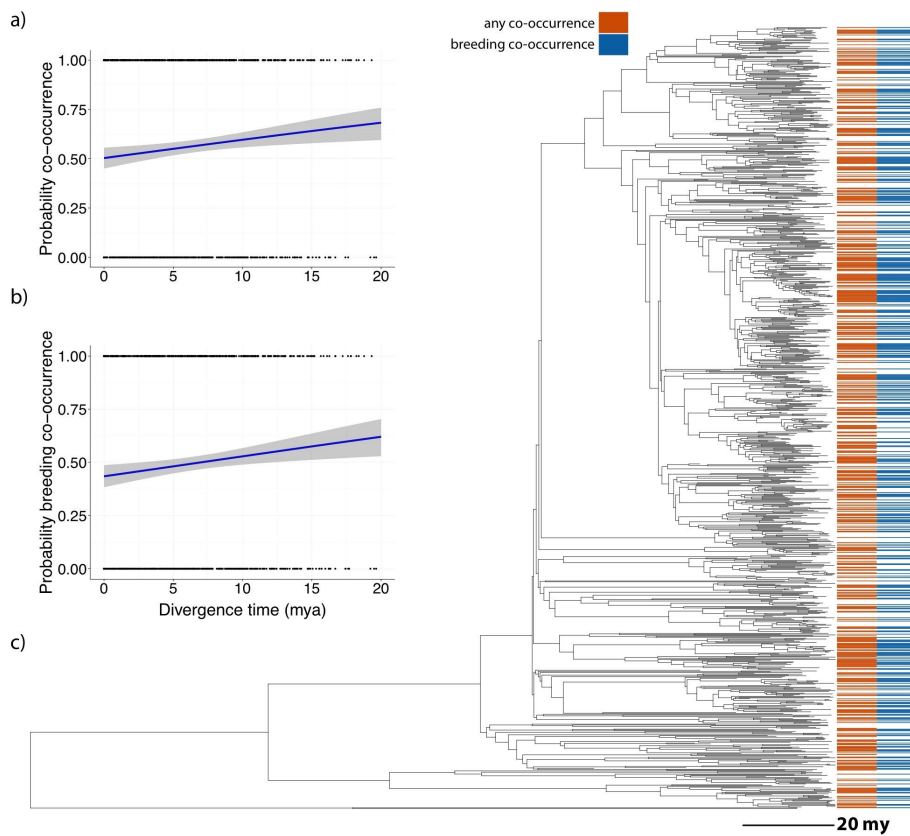

**Extended Data Figure 3 | Estimating the minimum rate of transition to secondary contact from allopatry.** Maximum intercepts estimated from generalized linear models of simulated species pair configurations (co-occurring or not co-occurring) from a simple Markov model of range dynamics. Simulations were accomplished via a Gillespie algorithm implementation of the Markov model, with the set of divergence times equal to the empirical divergence time estimates (see *Fossil calibration* section in Supplementary Information). Maximum intercepts are the maximum across all reverse transition rates (see Methods and Supplementary Information), with five replicates per reverse transition rate,  $\epsilon$ , for each forward rate,  $\sigma$ .

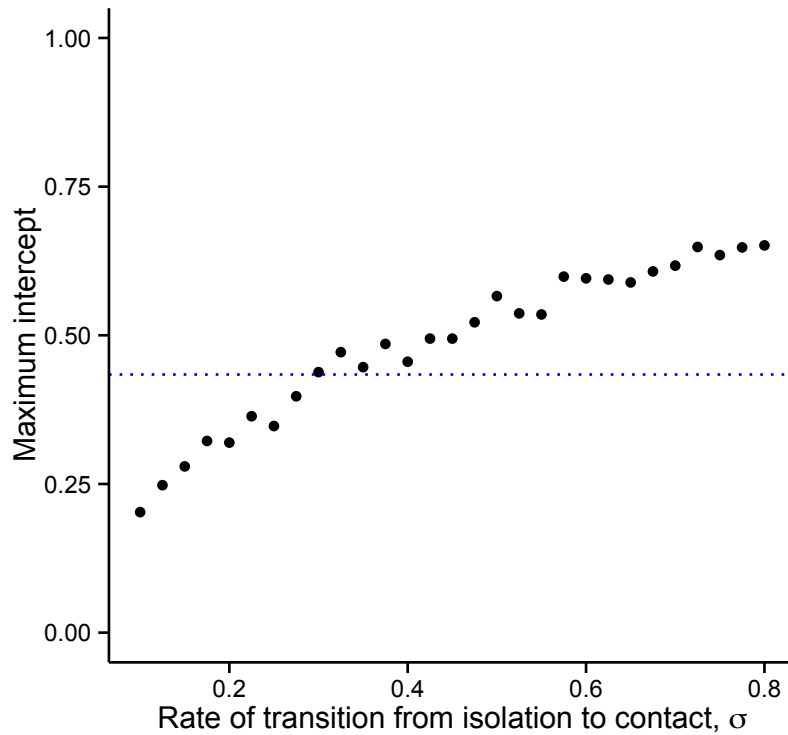

**Extended Data Figure 4 | Correlation of alternate divergence time estimates with those used in the main text** Plots of two alternate divergence time estimates for bird species pairs (mean divergence times across 100 pseudo-posterior samples from the Jetz et al. analyses, and estimates from a r8s analysis of the Burleigh tree with no time constraint imposed on the basal node) against the estimated divergence times used for analyses presented in the main text (from r8s analysis of the Burleigh tree, implementing a maximum node age of 110 million years for the basal node). The alternate divergence times are highly correlated with the Burleigh tree divergence times used in the main text, for which the maximum basal node age was 110 million years ( $r = .823$  for the Jetz et al. estimates, and  $r = .991$  for the no-constraint estimates from the Burleigh tree). Note that though ancient nodes are older when there is no maximum constraint on the basal node of the Burleigh et al. phylogeny, divergence time estimates for sister pairs are slightly younger.

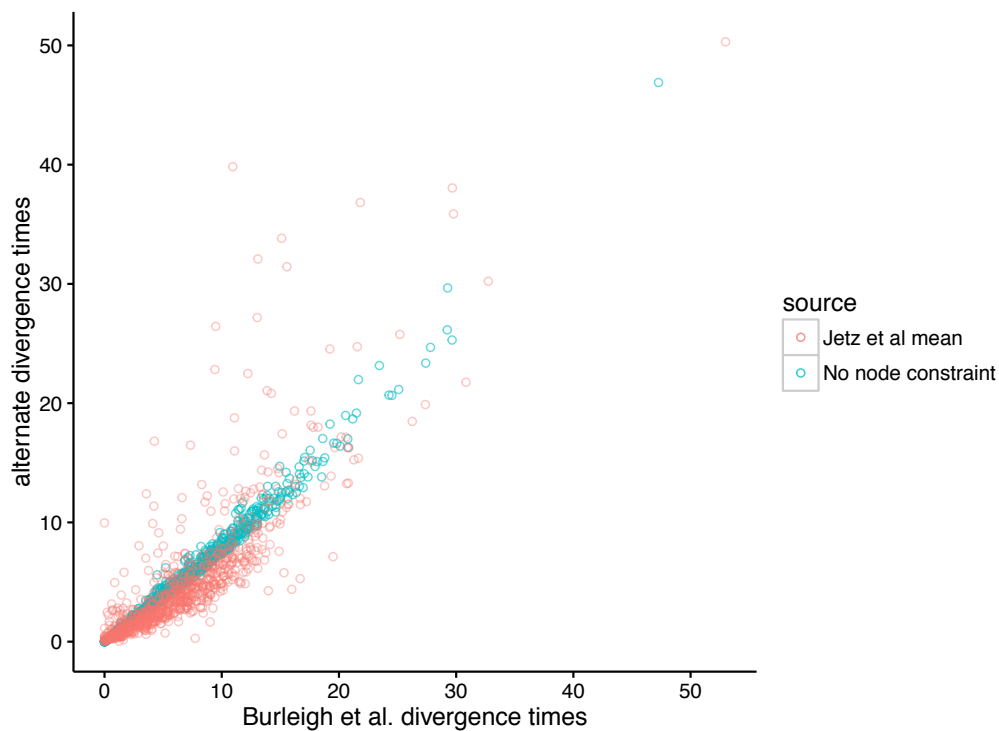

### Extended Data Figure 5 | Sensitivity analyses of the relationship of local co-occurrence and divergence time, using alternate divergence time estimates.

Predicted a) probability of local co-occurrence and b) probability of breeding range local co-occurrence for sister species of birds as a function of divergence time.

Divergence times are the means across 100 phylogenies from the posterior distribution of the Jetz et al. (2012) analysis. Points at 0 and 1 are individual data points from species pairs with “no co-occurrence” or “local co-occurrence.” These analyses indicate that the intercept is not near 0, counter the expectation stemming from extended allopatry as the dominant mode of bird speciation (Barraclough and Vogler 2000).

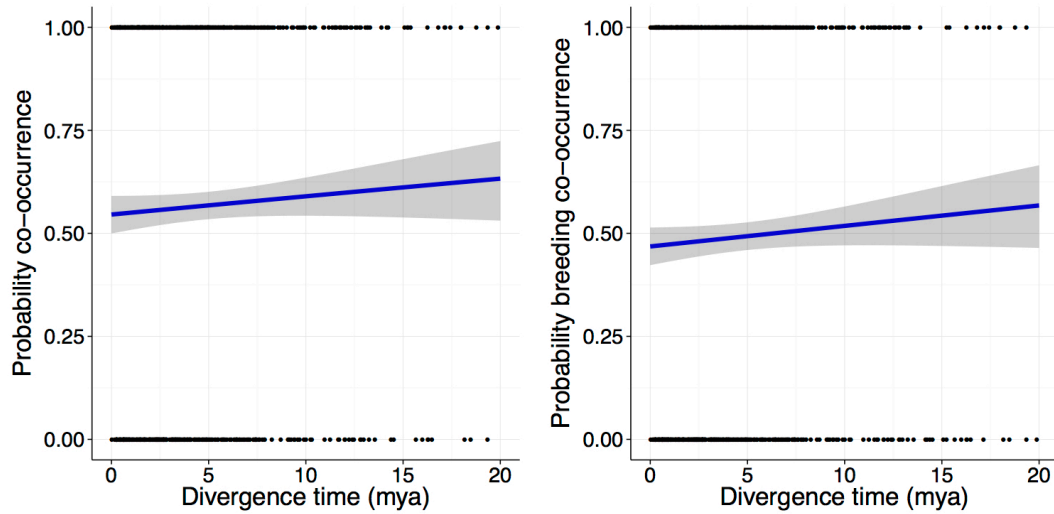

### Extended Data Figure 6| Sensitivity analyses examining the probability of local co-occurrence with divergence time

Sensitivity analyses for the relationship of the probability of co-occurrence with divergence time among bird sister pairs. Clouds of points represent the results of individual regressions of the probability of co-occurrence on divergence time, with divergence time estimates from 100 bootstrap samples of the Burleigh et al. (2015) phylogenetic analyses or from 10,000 samples from the pseudo-posterior of the Jetz et al. (2012) analyses. Black dots within each cloud represent either the results of analyses reported in the main text from the maximum likelihood phylogeny of Burleigh et al. (2015) or sensitivity analyses using the mean divergence time estimate for each sister pair from the Jetz et al. analysis pseudo-posterior. Note that there is little overall variation in the estimated slope and intercept for the probability of any co-occurrence or of breeding co-occurrence within and between phylogenetic analyses.

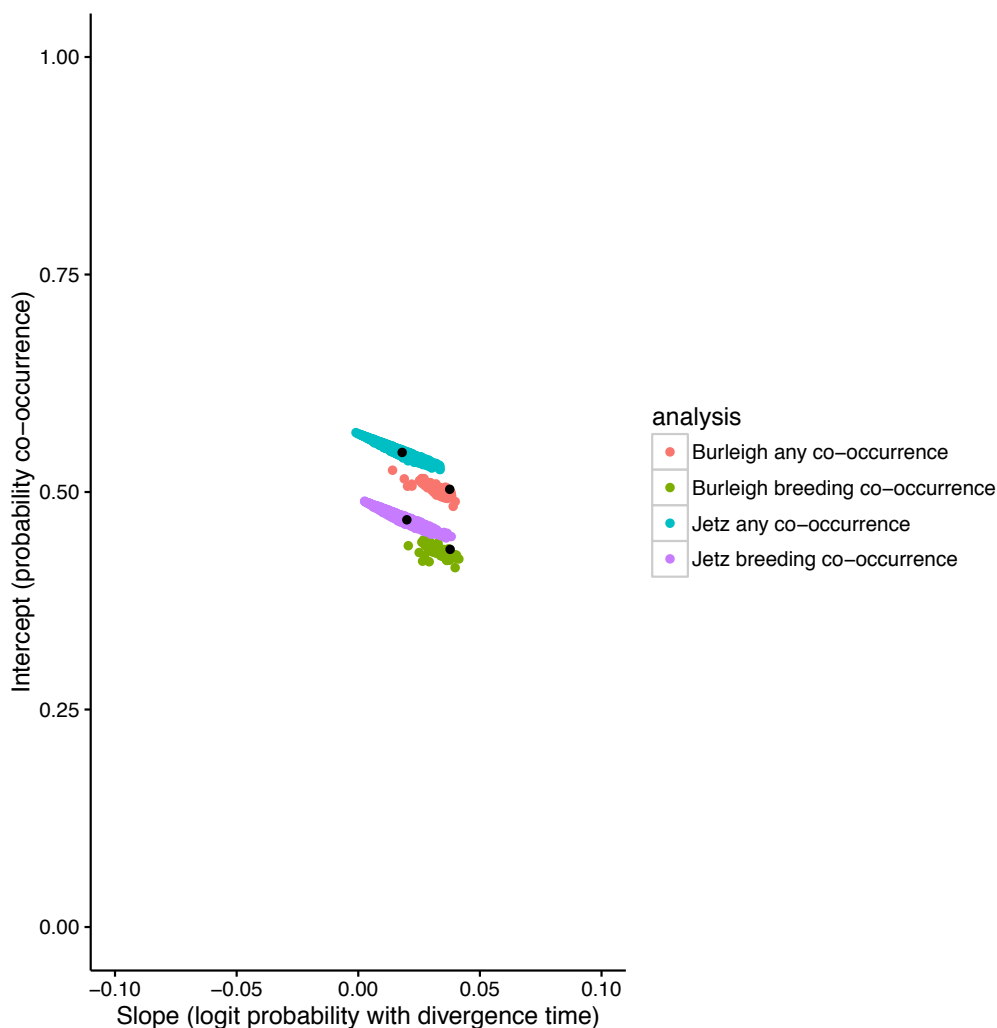

**Extended Data Fig. 7 | The relationship between probability of local co-occurrence and divergence time for different thresholds of the minimum number of observations.** Probability of any local co-occurrence with divergence time; minimum number of species observations equal to **a**, 20, and **c**, 50. Probability of breeding season local co-occurrence with divergence time; minimum number of species observations equal to **b**, 20, and **d**, 50. Note that the intercept of the relationship becomes higher with increasing observation number minima, and that the slopes of the relationship become slightly flatter (compare with Fig. 1a, b).

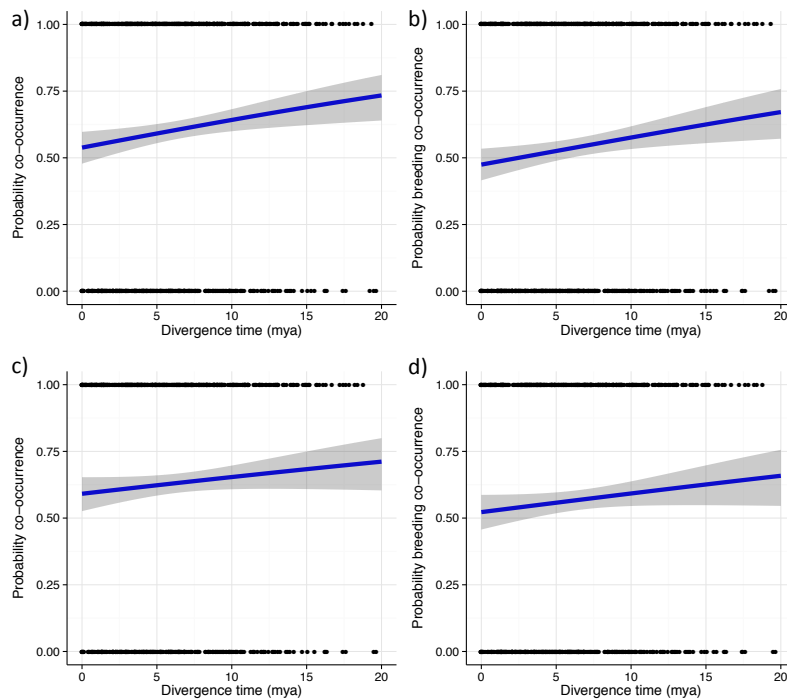



**Extended Data Figure 8 | Distributions of areas and distances covered by site-based inventories.** Histograms of observation areas ( $n = 608,855$ ) and distances ( $n = 3,918,920$ ) reported for eBird checklists, which correspond to observations given for a single reported locality.

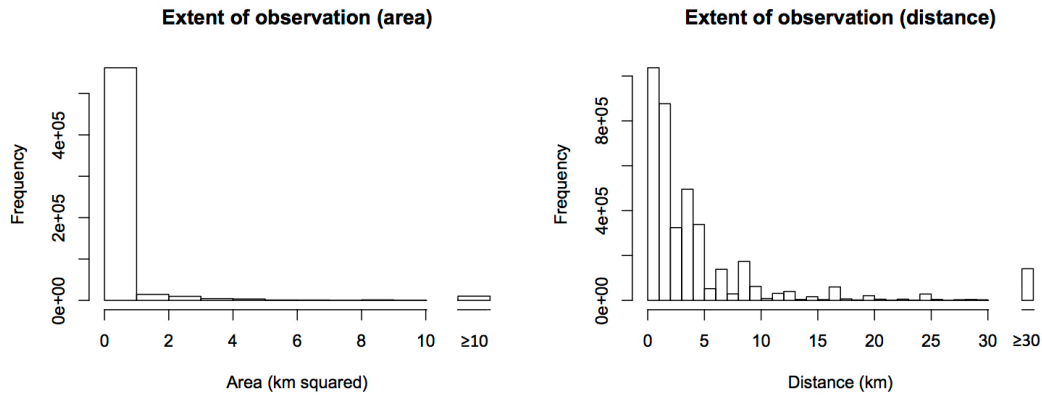

**Extended Data Figure 9 | Comparison of secondary contact and sympatry establishment across divergence times in sister pairs.** Proportion of breeding season co-occurring (orange) and breeding season sympatric (blue) sister species in 1-million year intervals. Circle sizes represent sample sizes ( $n$ ) within each 1-million-year interval, with  $n$  shown where  $\geq 50$ .

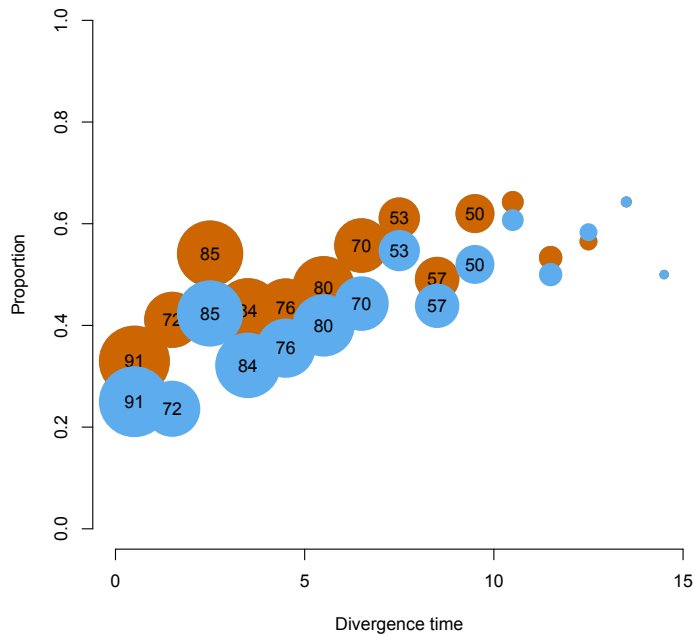

**Extended Data Figure 10 | Sensitivity analyses for the estimation of the minimum rate of transition to secondary contact from allopatry.** Maximum intercepts estimated from generalized linear models of simulated species pair configurations (co-occurring or not co-occurring) from a simple Markov model of range dynamics. Simulations were accomplished via a Gillespie algorithm implementation of the Markov model, with the set of divergence times equal to the empirical divergence time estimates (sensitivity analysis with Jetz *et al.* (2012) divergence times). Maximum intercepts are the maximum across all reverse transition rates (see Methods), with five replicates per reverse transition rate,  $\epsilon$ , for each forward rate,  $\sigma$ . We infer higher rates of transition from allopatry to secondary contact, and thus shorter average waiting times (see Supplementary Information).

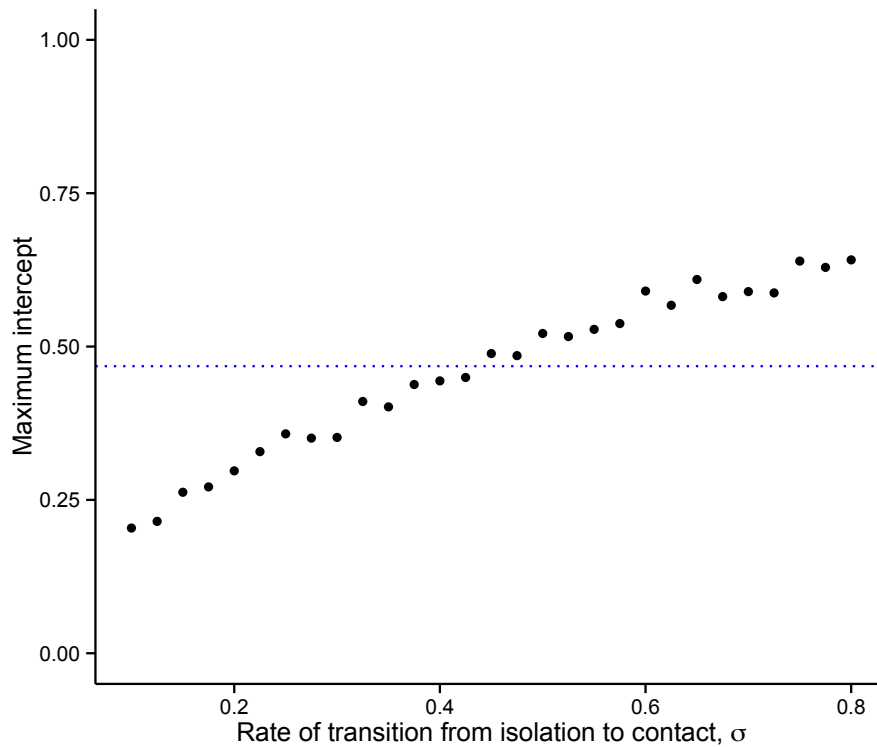

Source: http://biorxiv.org/content/10.1101/083253v1.full.pdf
